# Supplementary material for: ILF3 Mediated BMP2 and STAT1 Transcription Is Responsible for Hyperlipidemia-Induced Arteriosclerotic Calcification
Source: Research Square preprint supplement (doi:10.21203/rs.3.rs-102863/v1), 2020-11-14
Supplement: Supplementary file 1 [file 07eda0ddc98ffb4a5c455a9a.docx]

| Table 1. Primer sequences for RT-PCR and ChIP | |  |
| --- | --- | --- |
|  | Forward primer (5'-3') | Reverse primer (5'-3') |
| *ILF3* Homo | AACAAAAAGGTGGCGAAGGC | CCAGGGTTATGTGGCTTAGCA |
| *BMP2* Homo | ACTCGAAATTCCCCGTGACC | CCACTTCCACCACGAATCCA |
| *STAT1* Homo | TGGGCCTCCATCCTTTGGTA | ACTGCCAACTCAGCACTTCT |
| *β-actin* Homo | CATGTACGTTGCTATCCAGGC | CTCCTTAATGTCACGCACGAT |
| ChIP: *BMP2-1* Homo | AGAGCAGGGAGTGGAGGCGCGA | CGAACACCTCCCCCTTCGCG |
| ChIP: *BMP2-2* Homo | CGCGAAGGGGGAGGTGTTCG | CGCGGCGCTCGCGGCTTTTAAAG |
| ChIP: *BMP2-3* Homo | CTTTAAAAGCCGCGAGCGCCGCG | CCGAGAACGTTCGGGTAGCC |
| ChIP: *STAT1-1* Homo | AGTTCCCAGCGTGGCAACA | TCCGCGCTCAGCCAATTAGA |
| ChIP: *STAT1-2* Homo | CAGCCGCGTCTAATTGGC | GGAAAGCGAAACTACCCGGC |
